# Supplementary material for: Dual-enzymatically crosslinked and injectable hyaluronic acid hydrogels for potential application in tissue engineering
Source: Royal Society of Chemistry journal article supplement (doi:10.1039/c9ra09531d), 2020-01-01
Supplement: c9ra09531d1.pdf [file c9ra09531d1.pdf]

## Dual-enzymatically crosslinked and injectable hyaluronic acid hydrogels for potential application in tissue engineering

Luyu Wang, Jinrui Li, Dan Zhang, Shanshan Ma, Junni Zhang, Feng Gao, Fangxia Guan\*, and Minghao Yao\*

School of Life Science, Zhengzhou University, 100 Science Road, Zhengzhou 450001, P. R. China

\* Corresponding author: Minghao Yao and Fangxia Guan; email: yao453343550@126.com, guanfangxia@126.com

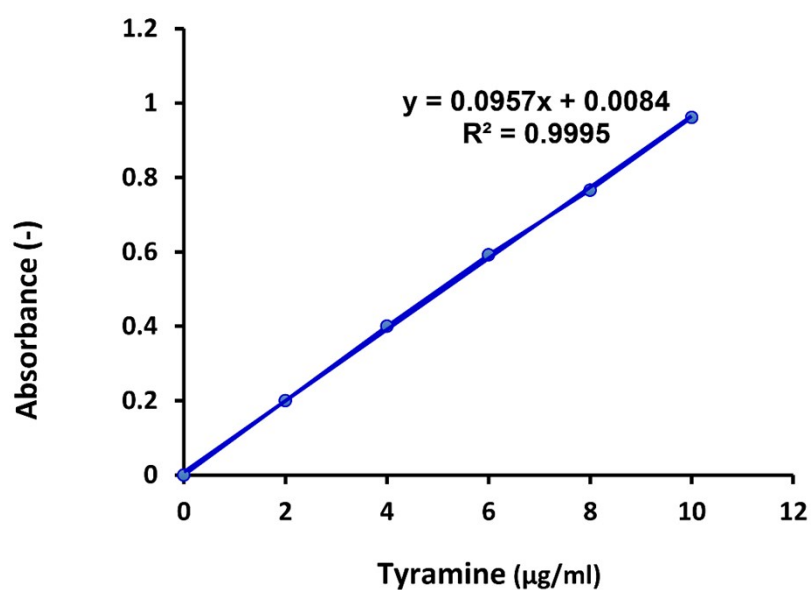

Figure S1 Standard curve of tyramine based on the absorbance of 275 nm using a UV-Vis spectrophotometer.

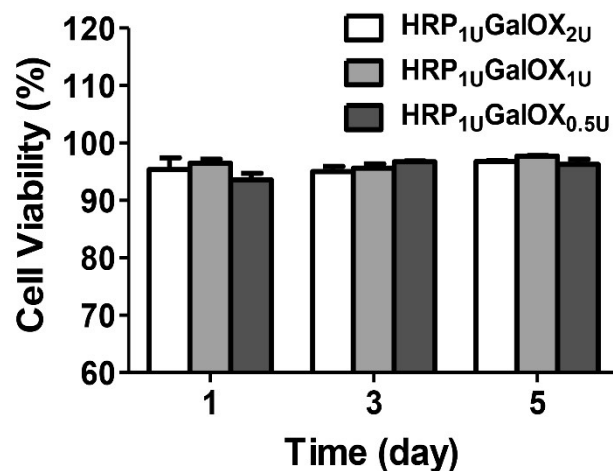

Figure S2 Cellular viability of BMSC encapsulated within 1% HT hydrogels of HRP<sub>10</sub>GalOX<sub>0.5U</sub>, HRP<sub>10</sub>GalOX<sub>1U</sub> and HRP<sub>10</sub>GalOX<sub>2U</sub> on day 1, day 3 and day 5. (Mean ± SD, n=3)

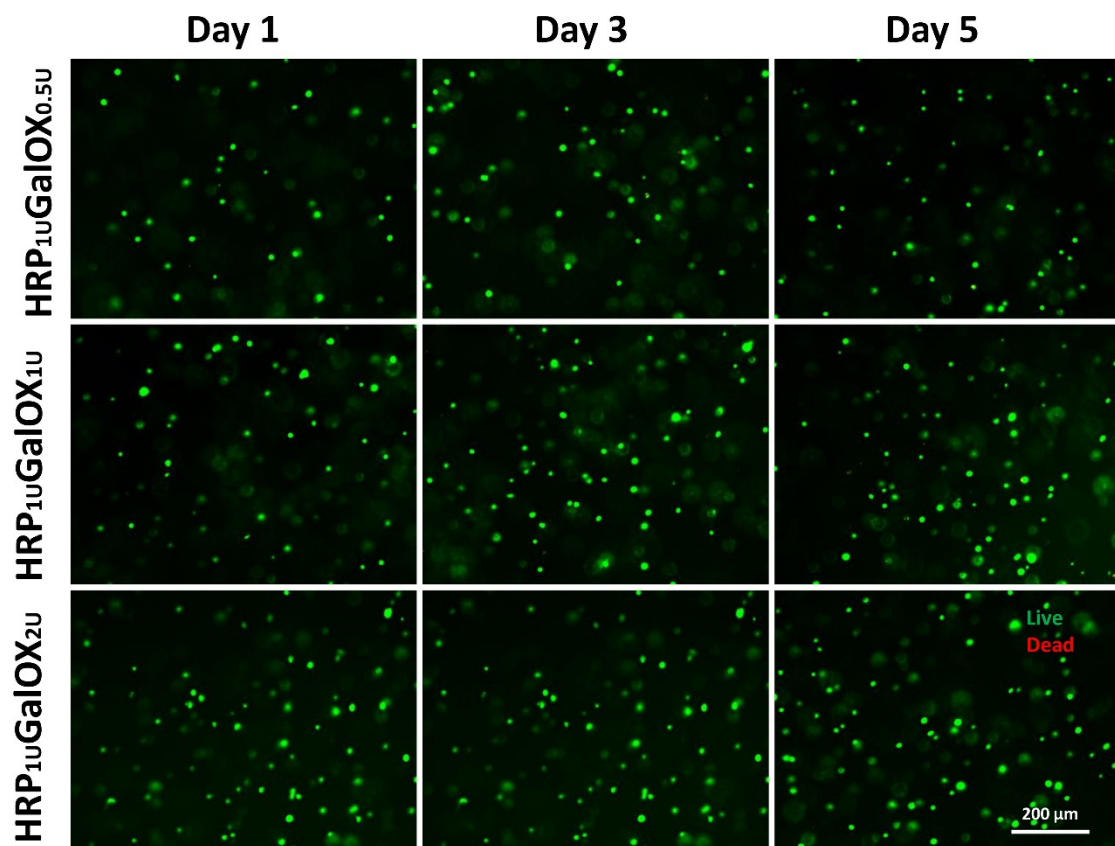

**Figure S3** Fluorescent images of BMSC encapsulated within 1% HT hydrogels of HRP<sub>1U</sub>GalOX<sub>0.5U</sub>, HRP<sub>1U</sub>GalOX<sub>1U</sub> and HRP<sub>1U</sub>GalOX<sub>2U</sub> on day 1, day 3 and day 5. Green labels the living cells and red labels the dead cells. Scale bar is 200  $\mu$ m.

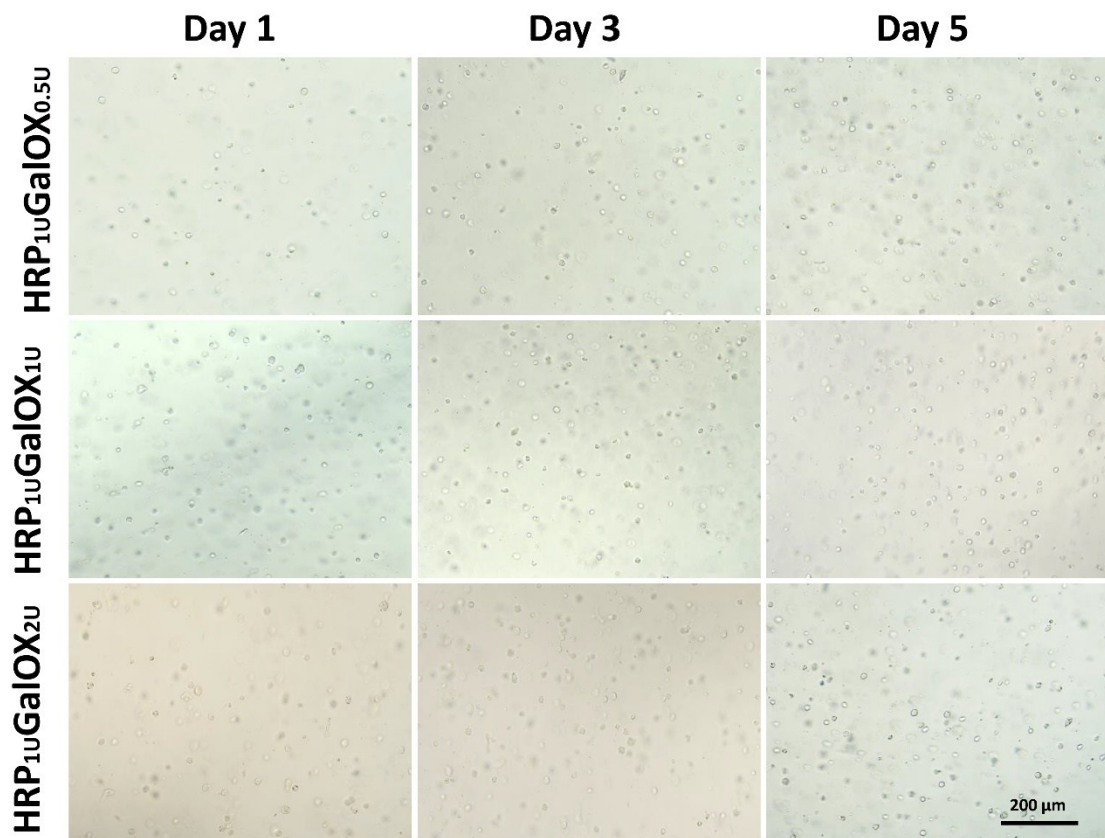

**Figure S4** Bright fields of BMSC encapsulated within 1% HT hydrogels of HRP<sub>1U</sub>GalOX<sub>0.5U</sub>, HRP<sub>1U</sub>GalOX<sub>1U</sub> and HRP<sub>1U</sub>GalOX<sub>2U</sub> on day 1, day 3 and day 5. Scale bar is 200  $\mu$ m.
